# Supplementary material for: Superordinate identities and self-transcendent emotions: Longitudinal study in Spain and Chile
Source: Front Psychol. 2022 Nov 11;13:989850. doi: 10.3389/fpsyg.2022.989850 (PMC9692013; doi:10.3389/fpsyg.2022.989850)
Supplement: Supplementary file 5 [file Table_5.docx]

***Supplementary Material***

# Supplementary Figures and Tables

**Supplementary Table 5**

*Correlations between Emotional Scales and IWAH Scale by Country and by Time*

| **Spain** | **Community**  **T1** | **Community**  **T2** | **Country**  **T1** | **Country**  **T2** | **Humanity**  **T1** | **Humanity**  **T2** | **Bond**  **T1** | **Bond**  **T2** | **Concern**  **T1** | **Concern**  **T2** |
| --- | --- | --- | --- | --- | --- | --- | --- | --- | --- | --- |
| **SOE T1** | .08 | .03 | .10d | .08 | .13c | .13c | .17b | .20b | .05 | .05 |
| **SOE T2** | -.04 | -.01 | .04 | .10d | .07 | .16c | .12d | .20b | .02 | .07 |
| **STE T1** | .36a | .28a | .34a | .33a | .30a | .28a | .31a | .26a | .19b | .22b |
| **STE T2** | .18b | .11d | .28a | .28a | .27a | .30a | .23a | .30a | .22b | .24a |
| **Chile** |  |  |  |  |  |  |  |  |  |  |
| **SOE T1** | .22b | .23a | .18b | .17b | .23a | .18b | .24a | .23a | .15c | .10d |
| **SOE T2** | .14c | .18b | .16b | .18b | .06 | .16b | .13c | .23a | -.02 | .05 |
| **STE T1** | .27a | .25a | .36a | .32a | .37a | .30a | .36a | .31a | .30a | .26a |
| **STE T2** | .28a | .32a | .29a | .33a | .21b | .31a | .25a | .32a | .12c | .24a |

*Note*: *nSpain* = 179; *nChile* = 224. Pearson correlation (unilateral). a*p* ≤ .001; b*p* ≤ .01; c*p* ≤ .05; d*p* ≤ .10.
